# Supplementary material
Source: Research Square preprint supplement (doi:10.21203/rs.3.rs-9867217/v1)
Supplement: Supplementary file 1 [file a6ca7c0f81345d026c90f86b.docx]

**Supplemental Table 1. List of 54 myeloid neoplasm-relevant genes studied in targeted NGS sequencing**

| **Gene name** | **Target region (exon)** | **Gene name** | **Target region (exon)** |
| --- | --- | --- | --- |
| ***ABL*** | 4-6 | ***JAK3*** | 13 |
| ***ASXL1*** | 12 | ***KDM6A*** | full |
| ***ATRX*** | 8-10, 17-31 | ***KIT*** | 2, 8-11, 13, 17 |
| ***BCOR*** | full | ***KRAS*** | 2, 3 |
| ***BCORL1*** | full | ***MLL*** | 5-8 |
| ***BRAF*** | 15 | ***MPL*** | 10 |
| ***CALR*** | 9 | ***MYD88*** | 3-5 |
| ***CBL*** | 8, 9 | ***NOTCH1*** | 26-28, 34 |
| ***CBLB*** | 9, 10 | ***NPM1*** | 12 |
| ***CBLC*** | 9, 10 | ***NRAS*** | 2, 3 |
| ***CDKN2A*** | full | ***PDGFRA*** | 12, 14, 18 |
| ***CEBPA*** | full | ***PHF6*** | Full |
| ***CSF3R*** | 14-17 | ***PTEN*** | 5, 7 |
| ***CUX1*** | full | ***PTPN11*** | 3, 13 |
| ***DNMT3A*** | full | ***RAD21*** | Full |
| ***ETV6*** | full | ***RUNX1*** | Full |
| ***EZH2*** | full | ***SETBP1*** | 4 (partial) |
| ***FBXW7*** | 9-11 | ***SF3B1*** | 13-16 |
| ***FLT3*** | 14, 15, 20 | ***SMC1A*** | 2, 11, 16, 17 |
| ***GATA1*** | 2 | ***SMC3*** | 10, 13, 19, 23, 25, 28 |
| ***GATA2*** | 2-6 | ***SRSF2*** | 1 |
| ***GNAS*** | 8, 9 | ***STAG2*** | full |
| ***HRAS*** | 2, 3 | ***TET2*** | 3-11 |
| ***IDH1*** | 4 | ***TP53*** | 2-11 |
| ***IDH2*** | 4 | ***U2AF1*** | 2, 6 |
| ***IKZF1*** | full | ***WT1*** | 7, 9 |
| ***JAK2*** | 12, 14 | ***ZRSR2*** | full |

**Supplemental Table 2. Classification based on French-American-British classification, 2016, 2022 World Health Organization classification and International Consensus Classification**

| Classification | Number (%) | Classification | Number (%) |
| --- | --- | --- | --- |
| FAB |  | AML with |  |
| RA | 23 (12.0) | *NPM1* | 11 (5.7) |
| RAS | 7 (3.6) | MDS-related genes mutations | 17 (8.9) |
| RAEB | 107 (55.7) | MDS-related cytogenetics | 3 (1.6) |
| RAEB-T | 55 (28.6) | *NUP98* rearrangement | 3 (1.6) |
| 2016 WHO classification |  | defined by differentiation | 27 (14.1) |
| MDS-5q | 1 (0.5) | **ICC** |  |
| MDS-SLD | 5 (2.6) | MDS |  |
| MDS-MLD | 17 (8.9) | del(5q) | 1 (0.5) |
| MDS-RS-SLD | 3 (1.6) | mutated *SF3B1* | 6 (3.1) |
| MDS-RS-MLD | 4 (2.1) | NOS, with SLD | 5 (2.6) |
| MDS-EB1 | 51 (26.6) | NOS, with MLD | 18 (9.4) |
| MDS-EB2 | 56 (29.2) | EB | 51 (26.6) |
| MDS-U | 0 (0.0) | mutated *TP53* | 5 (2.6) |
| AML with MRC | 10 (5.2) | MDS/AML |  |
| Therapy relaetd AML | 2 (1.0) | MDS-related genes mutations | 28 (14.6) |
| AML with mutated *NPM1* | 7 (3.6) | MDS-related cytogenetics | 1 (0.5) |
| AML with mutated *RUNX1* | 8 (4.2) | mutated *TP53* | 2 (1.0) |
| AML, NOS | 28 (14.6) | NOS | 14 (7.3) |
| 2022 WHO classification |  | AML with |  |
| MDS-5q | 1 (0.5) | *NPM1* | 10 (5.2) |
| MDS-*SF3B1* | 6 (3.1) | *CEBPA* | 2 (1.0) |
| MDS-h | 9 (4.7) | *TP53* | 3 (1.6) |
| MDS-LB | 14 (7.3) | MDS-related genes mutations | 18 (9.4) |
| MDS-IB1 | 42 (21.9) | MDS-related cytogenetics | 8 (4.2) |
| MDS-IB2 | 46 (24.0) | *NUP98* rearrangement | 2 (1.0) |
| MDS-f | 9 (4.7) | NOS | 18 (9.4) |
| MDS-bi*TP53* | 4 (2.1) |  |  |

Abbreviations: AML, acute myeloid leukemia; FAB, French-American-British classification; MDS-RS, MDS with ring sideroblasts; ICC, international consensus classification; MDS-EB, MDS with excess blasts; MDS-SLD, MDS with single lineage dysplasia; MDS-MLD, MDS with multilineage dysplasia; MDS-RS-SLD, MDS with ring sideroblasts and single lineage dysplasia; MDS-RS-MLD, MDS with ring sideroblasts and multilineage dysplasia; MDS-U, MDS, unclassifiable; MDS-5q, MDS with low blasts and isolated 5q deletion; MDS-*SF3B1*, MDS with low blasts and *SF3B1* mutation; MDS-LB, MDS with low blasts; MDS-h, hypoplastic MDS; MDS-IB1, MDS with increased blasts-1; MDS-IB2, MDS with increased blasts-2; MDS-f, MDS with fibrosis; MDS-bi*TP53*, MDS with biallelic *TP53* inactivation; MRC, myelodysplasia-related changes; NOS, not otherwise specified; RA, refractory anemia; RAS, refractory anemia with ring sideroblasts; RAEB, refractory anemia with excess blasts; RAEB-T, refractory anemia with excess blasts in transformation; WHO, world health organization;

**Supplemental Table 3. Genetic landscape**

| Gene | Number (%) | Gene | Number (%) |
| --- | --- | --- | --- |
| Epigenetics modifiers | 104 (54.2) | *CBL* | 5 (2.6) |
| DNA methylation | 58 (30.2) | *PTPN11* | 10 (5.2) |
| *DNMT3A* | 21 (10.9) | *JAK2* | 4 (2.1) |
| *TET2* | 16 (8.3) | **Transcription factor** | 53 (27.6) |
| *IDH1* | 6 (3.1) | *CEBPA* | 18 (9.4) |
| *IDH2* | 13 (6.8) | *CEBPA* biZIP | 2 (1.0) |
| *WT1* | 16 (8.3) | *RUNX1* | 27 (14.1) |
| Chromatin modifiers | 60 (31.3) | *GATA2* | 7 (3.6) |
| *ASXL1* | 30 (15.6) | *ETV6* | 7 (3.6) |
| *EZH2* | 8 (4.2) | **Spliceosome-complex** | 60 (31.3) |
| *KMT2A* | 3 (1.6) | *U2AF1* | 28 (14.6) |
| *SETBP1* | 6 (3.1) | *SRSF2* | 8 (4.2) |
| *BCOR* | 17 (8.9) | *ZRSR2* | 10 (5.2) |
| *BCORL1* | 3 (1.6) | *SF3B1* | 17 (8.9) |
| *PHF6* | 8 (4.2) | **Cohesin complex** | 13 (6.8) |
| Activated signaling | 39 (20.3) | *SMC3* | 1 (0.5) |
| *FLT3-*ITD | 5 (2.6) | *STAG2* | 12 (6.3) |
| *FLT3-*TKD | 4 (2.1) | **Tumor suppressor** | 17 (8.9) |
| *KIT* | 3 (1.6) | *TP53* | 14 (7.3) |
| *KRAS* | 6 (3.1) | *CUX1* | 3 (1.6) |
| *NRAS* | 12 (6.3) | *NPM1* | 13 (6.8) |

*P* values of <0.05 are statistically significant.

Data are presented as n (%).

Note: Large insertion in *FLT3*-ITD and high GC content in *CEBPA* limited the detection and quantification by NGS.

**Supplemental Table 4. Univariable Cox regression analysis for relapse-free survival (RFS) and overall survival (OS)**

| Variables  (N=192) | RFS | | OS | |
| --- | --- | --- | --- | --- |
| **HR (95% CI)** | ***P* value** | **HR (95% CI)** | ***P* value** |
| Age* | 1.02 (1.01-1.04) | **0.006** | 1.02 (1.00-1.04) | 0.019 |
| Male | 1.03 (0.70-1.53) | 0.876 | 1.25 (0.82-1.91) | 0.298 |
| IPSS-M (at diagnosis) |  | **0.002** |  | **0.009** |
| Very low/low | Reference | **-** | Reference | **-** |
| Moderate low | 1.27 (0.36-4.51) | 0.711 | 1.33 (0.30-5.98) | 0.707 |
| Moderate high | 2.31 (0.89-6.03) | 0.086 | 2.82 (0.91-8.76) | 0.072 |
| High | 1.90 (0.74-4.85) | 0.182 | 2.56 (0.86-7.62) | 0.091 |
| Very high | 3.91 (1.67-9.14) | **0.002** | 4.38 (1.58-12.16) | **0.005** |
| IPSS-R (at diagnosis) |  | **0.003** |  | **0.012** |
| Very low/low | Reference | **-** | Reference | **-** |
| Intermediate | 1.77 (0.80-3.96) | 0.161 | 1.95 (0.79-4.84) | 0.149 |
| High | 2.67 (1.23-5.80) | **0.013** | 2.65 (1.10-6.41) | **0.030** |
| Very high | 3.51 (1.64-7.54) | **0.001** | 3.56 (1.50-8.45) | **0.004** |
| IPSS-R (pre-transplant) |  | 0.182 |  | 0.357 |
| Very low/low | Reference | **-** | Reference | **-** |
| Intermediate | 0.87 (0.46-1.62) | 0.650 | 0.91 (0.45-1.83) | 0.787 |
| High | 1.48 (0.88-2.50) | 0.143 | 1.42 (0.80-2.52) | 0.226 |
| Very high | 1.92 (0.81-4.59) | 0.141 | 1.86 (0.72-4.82) | 0.200 |
| Pre-transplant BM blast |  |  |  |  |
| <10% | Reference | **-** | Reference | **-** |
| 10-<30% | 1.34 (1.06-1.71) | **0.017** | 1.25 (1.05-1.47) | **0.011** |
| Pre-transplant BM blast |  |  |  |  |
| <5% | Reference | - | Reference | **-** |
| 5-30% | 1.74 (1.13-2.67) | **0.012** | 1.59 (1.00-2.54) | 0.052 |
| Pre-transplant MRD by MFC | 1.18 (0.74-1.89) | 0.487 | 1.13 (0.68-1.86) | 0.639 |
| Pre-transplant disease status |  |  |  |  |
| CR+CRh+CRL (vs. others) | 1.28 (0.83-1.97) | 0.272 | 0.76 (0.48-1.20) | 0.238 |
| Pre-transplant treatment |  |  |  |  |
| HMA monotherapy | 0.82 (0.56-1.21) | 0.323 | 0.82 (0.55-1.24) | 0.354 |
| Venetoclax-based | 1.00 (0.44-2.29) | 0.996 | 0.81 (0.33-2.01) | 0.650 |
| Intensive chemotherapy | 1.62 (1.07-2.45) | **0.022** | 1.41 (0.92-2.18) | 0.117 |
| Post 1-month MRD by MFC | 1.46 (0.88-2.44) | 0.147 | 1.68 (0.99-2.87) | 0.056 |
| Post 1-month MRD by NGS† | 5.12 (2.83-9.24) | **<0.001** | 2.44 (1.30-4.61) | **0.006** |
| Conditioning regimen |  |  |  |  |
| RIC | Reference | **-** | Reference | **-** |
| MAC | 0.79 (0.63-1.00) | 0.053 | 0.84 (0.66-1.07) | 0.167 |
| Acute GVHD |  | **0.027** |  | **<0.001** |
| Grade 0 | Reference | **-** | Reference | **-** |
| Grade 1-2 | 0.84 (0.48-1.45) | 0.529 | 0.86 (0.52-1.42) | 0.559 |
| Grade 3-4 | 2.19 (1.14-4.23) | **0.019** | 2.55 (1.56-4.18) | **<0.001** |
| Chronic GVHD |  | **0.005** |  | **<0.001** |
| no cGVHD | Reference | **-** | Reference | **-** |
| mild | 0.52 (0.33-0.82) | **0.005** | 0.33 (0.20-0.55) | **<0.001** |
| moderate | 0.40 (0.21-0.77) | **0.006** | 0.29 (0.14-0.60) | **0.001** |
| severe | 0.57 (0.29-1.12) | 0.105 | 0.33 (0.15-0.74) | **0.007** |
| Post-transplant maintenance | 0.73 (0.32-1.67) | 0.458 | 0.69 (0.28-1.71) | 0.420 |

*P* values of <0.05 are statistically significant.

*As continuous variables analysis.

†*DNMT3A, TET2, ASXL1* mutations were excluded.

Abbreviations: BM, bone marrow; CI, confidence interval; CR, complete remission; CRL, CR with limited count recovery; CRh, CR with partial hematologic recovery; MRD, measureable residual disease; GVHD, graft-versus-host disease; HR, hazard ratio; HMA, hypomethylating agents; IPSS-M, Molecular International Prognostic Scoring System; IPSS-R, Revised International Prognostic Scoring System; MRD, measurable residual disease; MFC, multiparametric flow cytometry; MAC, myeloablative conditioning; NGS, next generation sequencing; PR, partial response; PD, progressive disease; RIC, reduced intensity conditioning

**Supplemental Table 5. Sensitivity analysis excluding patients diagnosed with AML based on 2016 World Health Organization (WHO) classification, 2022 WHO classification and International Consensus classification (ICC)**

| Analysis cohort | N | Endpoint | HR (95% CI) | P value |
| --- | --- | --- | --- | --- |
| Primary cohort | 192 | RFS | 10.22 (2.84-36.82) | **<0.001** |
| Excluding AML by 2016 WHO definition | 137 | RFS | 10.19 (3.07-33.77) | **<0.001** |
| Excluding AML by 2022 WHO definition | 130 | RFS | 9.67 (2.91-32.10) | **<0.001** |
| Excluding AML by ICC definition | 130 | RFS | 9.45 (2.84-31.44) | **<0.001** |
| Primary cohort | 192 | OS | 5.46 (2.04-14.62) | **0.001** |
| Excluding AML by 2016 WHO definition | 137 | OS | 2.97 (0.84-10.55) | **0.092** |
| Excluding AML by 2022 WHO definition | 130 | OS | 2.92 (0.83-10.33) | **0.097** |
| Excluding AML by ICC definition | 130 | OS | 2.96 (0.84-10.47) | **0.092** |

Abbreviation: AML, acute myeloid leukemia; HR, hazard ratio; RFS, relapse-free survival; OS, overall survival

**Supplemental Figure 1. Study flow diagram of patient selection.**

**Enrollment**

**Assessed for eligibility**

**(n = 1687)**

**HSCT recipients**

**(n = 288)**

**Excluded (n = 15)**

**No cryopreserved BM sample**

**at 1 month post-transplant**

**Excluded (n = 81)**

**Missing diagnostic NGS data or absence of mutations**

**Excluded (n = 1399)**

**No HSCT**

**Analysis**

**Final cohort**

**(n = 192)**

**1-month cryopreserved BM samples available**

**(n = 192)**

**NGS at diagnosis available**

**(n = 207)**

Abbreviation: BM, bone marrow; HSCT, allogeneic hematopoietic stem cell transplantation; NGS, next-generation sequencing

**Supplemental Figure 2. Time to disease relapse (a), relapse-free survival (RFS) (b) and overall survival (OS) (c) in patients with myelodysplastic syndromes/neoplasms undergoing allogeneic hematopoietic stem cell transplantation (HSCT) according to pre-transplant disease status**

| (a) | (b) |
| --- | --- |
| 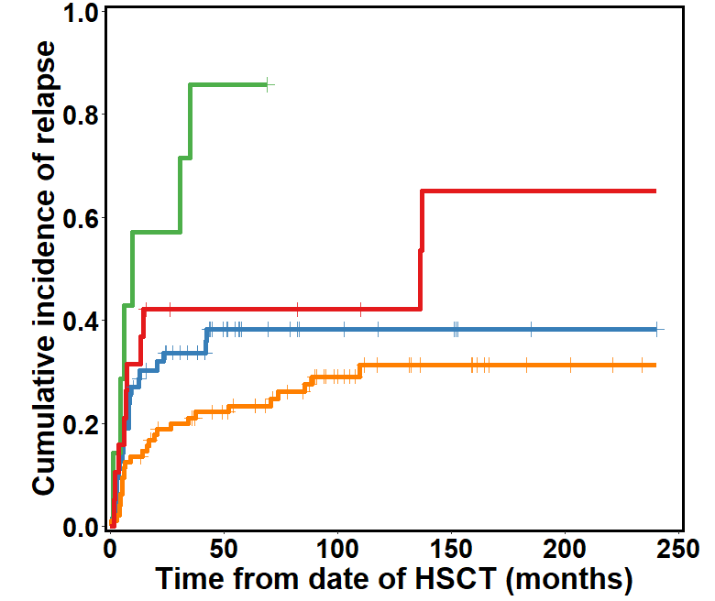  ***P*=0.001**  **CR + CRL + CRh, n=63, median time to relapse: not reached**  **PR, n=7, median time to relapse: 9.4 months**  **No response, n=98, median time to relapse: not reached**  **PD, n=20, median time to relapse: 136.2 months** | 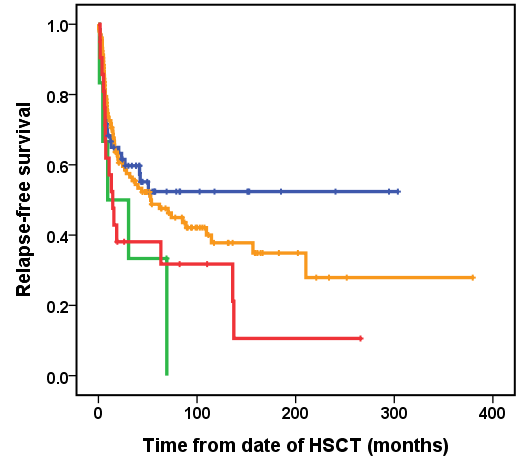  ***P*=0.081**  **CR + CRL + CRh, n=63, median RFS: not reached**  **PR, n=7, median RFS: 9.4 months**  **No response, n=98, median RFS: 53.0 months**  **PD, n=20, median RFS: 14.5 months** |
| (c) |  |
| 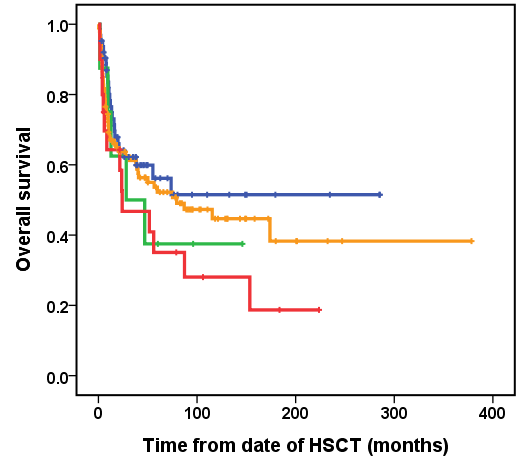  ***P*=0.298**  **CR + CRL + CRh, n=63, median OS: not reached**  **PR, n=7, median OS: 28.2 months**  **No response, n=98, median OS: 79.3 months**  **PD, n=20, median OS: 24.1 months** |  |

Abbreviation: CR, complete remission; CRL, CR with limited count recovery; CRh, CR with partial hematologic recovery; PR, partial response; PD, progressive disease

**Supplemental Figure 3. Time to disease relapse (a), relapse-free survival (RFS) (b) and overall survival (OS) (c) in patients with myelodysplastic syndromes/neoplasms undergoing allogeneic hematopoietic stem cell transplantation (HSCT) according to pre-transplant bone marrow blast percentage**

| (a) | (b) |
| --- | --- |
| 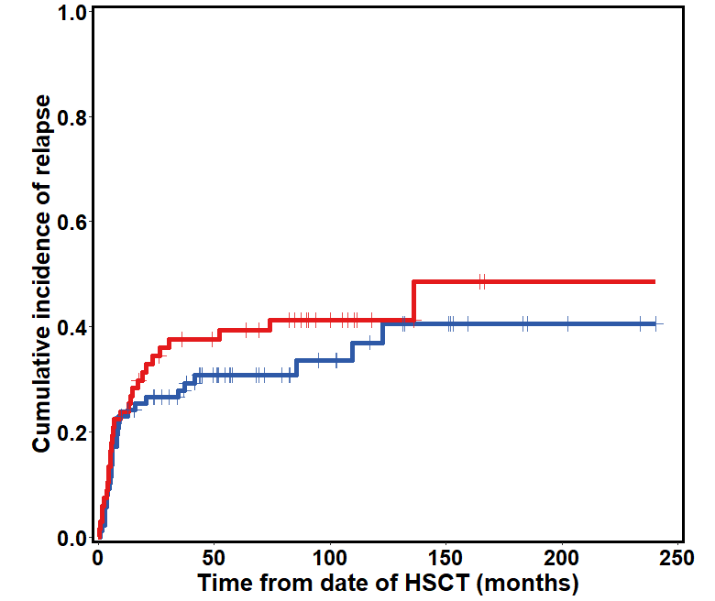  ***P*=0.36**  **BM blast <5% (-), n=87, median time to relapse: not reached**  **BM blast 5-30%, n=67, median time to relapse: 136.2 months** | 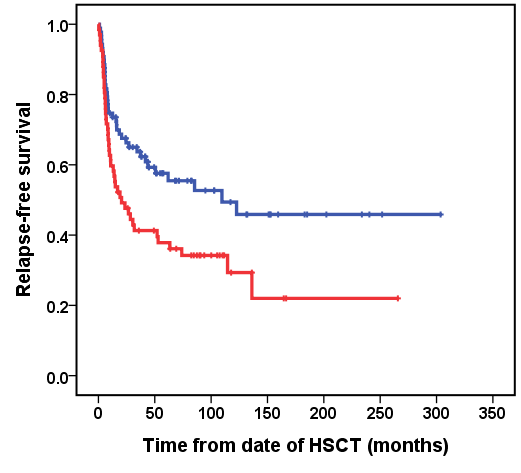  ***P*=0.011**  **BM blast <5% (-), n=87, median RFS: 109.6 months**  **BM blast 5-30%, n=67, median RFS: 20.5 months** |
| (c) |  |
| 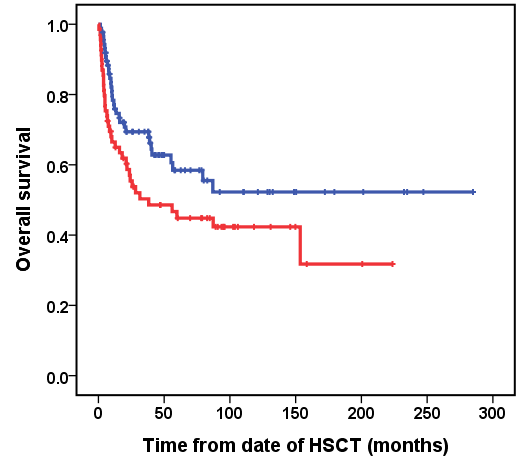  **BM blast <5% (-), n=87, median OS: not reached**  **BM blast 5-30%, n=69, median OS: 38.2 months**  ***P*=0.050** |  |

**Supplemental Figure 4. Time to disease relapse (a), relapse-free survival (RFS) (b), and overall survival (OS) (c) in patients with myelodysplastic syndromes/neoplasms undergoing allogeneic hematopoietic stem cell transplantation (HSCT) according to pre-transplant multiparametric flow cytometry–based measurable residual disease (MRD)**

| (a) | (b) |
| --- | --- |
| 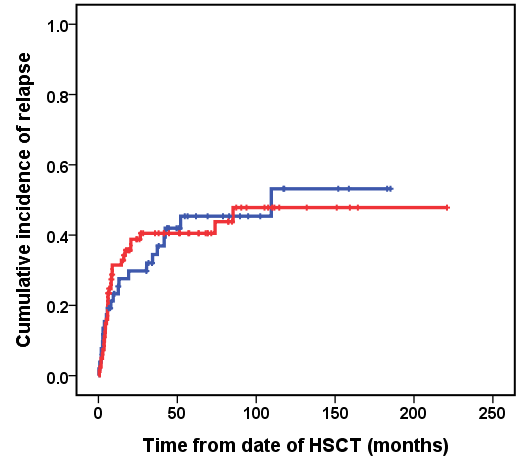  **MRD (-), n=52, median time to relapse: 109.6 months**  **MRD (+), n=77, median time to relapse: not reached**  ***P*=0.98** | 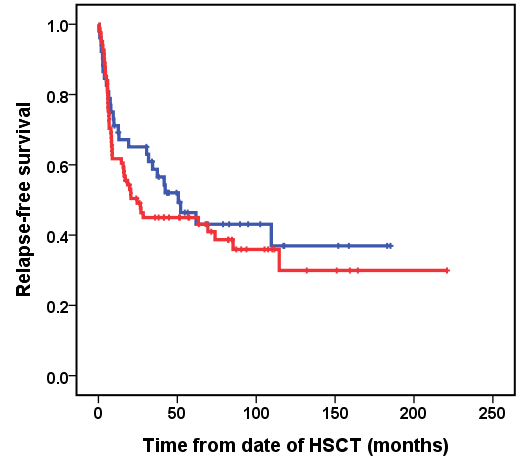  ***P*=0.487**  **MRD (-), n=52, median RFS: 50.6 months**  **MRD (+), n=77, median RFS: 24.5 months** |
| (c) |  |
| 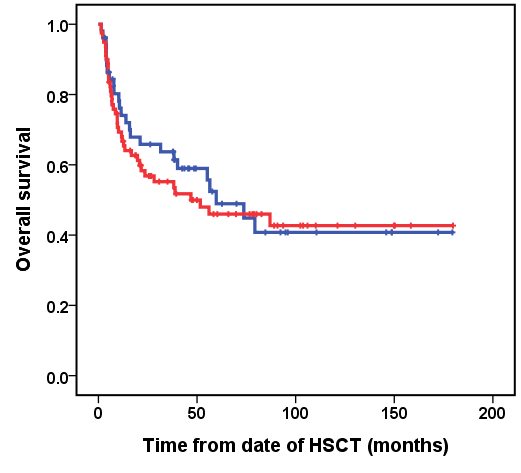  **MRD (-), n=52, median OS: 59.7 months**  **MRD (+), n=79, median OS: 46.9 months**  ***P*=0.639** |  |

**Supplemental Figure 5. Time to disease relapse (a), relapse-free survival (RFS) (b) and overall survival (OS) (c) in patients with myelodysplastic syndromes/neoplasms undergoing allogeneic hematopoietic stem cell transplantation (HSCT) according to next-generation sequencing–based measurable residual disease (MRD) status at 1 month post-transplant.**

| (a) | (b) |
| --- | --- |
| 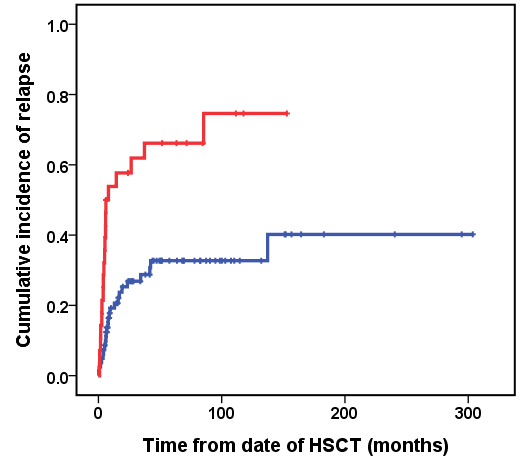  ***P*<0.001**  **MRD (-), n=79, median time to relapse: not reached**  **MRD (+), n=28, median time to relapse: 6.0 months** | 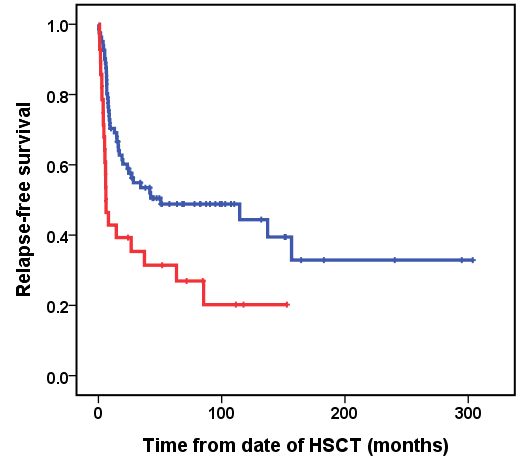  **MRD (-), n=79, median RFS: 50.6 months**  **MRD (+), n=28, median RFS: 6.0 months**  ***P*=0.004** |
| (c) |  |
| 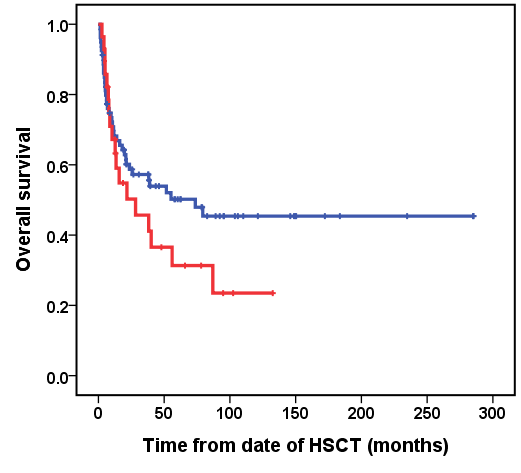  ***P*=0.210**  **MRD (-), n=80, median OS: 73.7 months**  **MRD (+), n=28, median OS: 28.2 months** |  |

**Supplemental Figure 6. Time to disease relapse (a), relapse-free survival (RFS) (b) and overall survival (OS) (c) in patients with revised international prognostic scoring system very low, low, or intermediate-risk group myelodysplastic syndromes/neoplasms at diagnosis undergoing allogeneic hematopoietic stem cell transplantation (HSCT) according to next-generation sequencing–based measurable residual disease (MRD) status at 1 month post-transplant. MRD assessment excluded mutations in *DNMT3A*, *TET2*, and *ASXL1.***

| (a) | (b) |
| --- | --- |
| 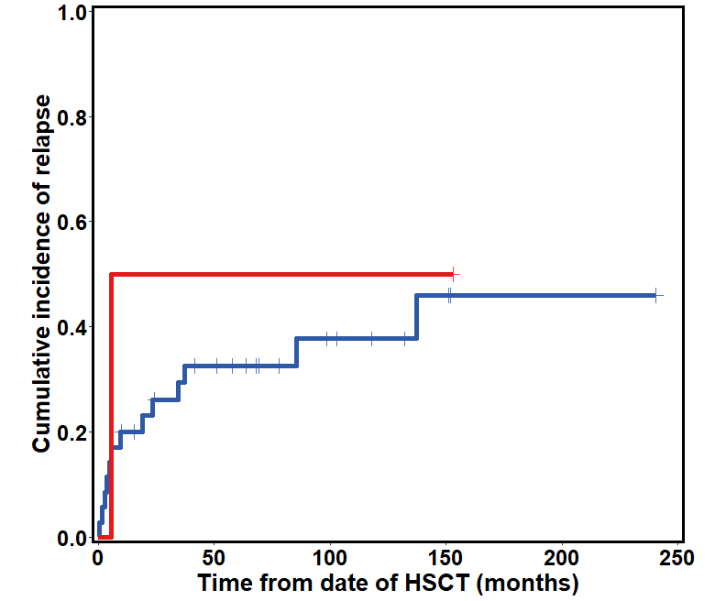  ***P*=0.82**  **MRD (-), n=35, median time to relapse: not reached**  **MRD (+), n=2, median time to relapse: 5.8 months** | 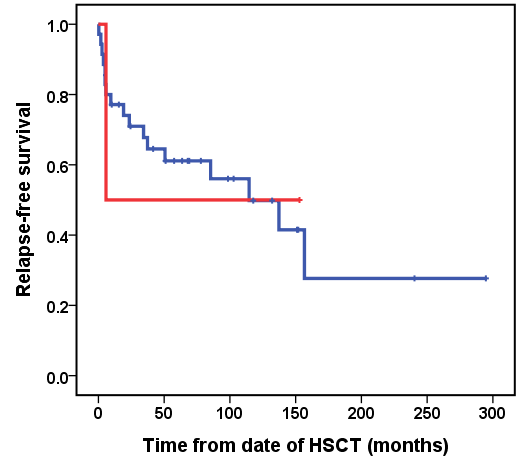  **MRD (-), n=35, median RFS: 114.6 months**  **MRD (+), n=2, median RFS: 5.8 months**  ***P*=0.958** |
| (c) |  |
| 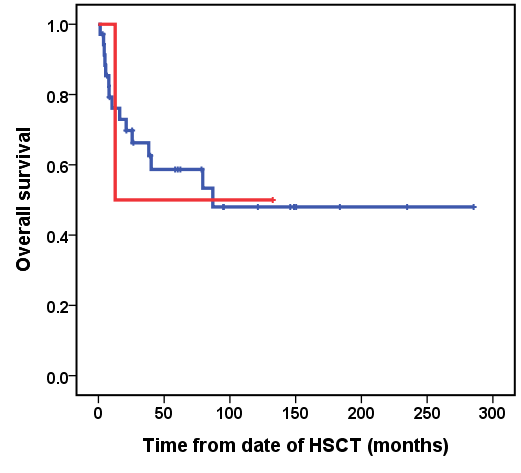  ***P*=0.996**  **MRD (-), n=35, median OS: 87.0 months**  **MRD (+), n=2, median OS: 12.7 months** |  |

**Supplemental Figure 7. Time to disease relapse (a), relapse-free survival (RFS) (b) and overall survival (OS) (c) in patients with revised international prognostic scoring system high or very high-risk group myelodysplastic syndromes/neoplasms at diagnosis undergoing allogeneic hematopoietic stem cell transplantation (HSCT) according to next-generation sequencing–based measurable residual disease (MRD) status at 1 month post-transplant. MRD assessment excluded mutations in *DNMT3A*, *TET2*, and *ASXL1.***

| (a) | (b) |
| --- | --- |
| 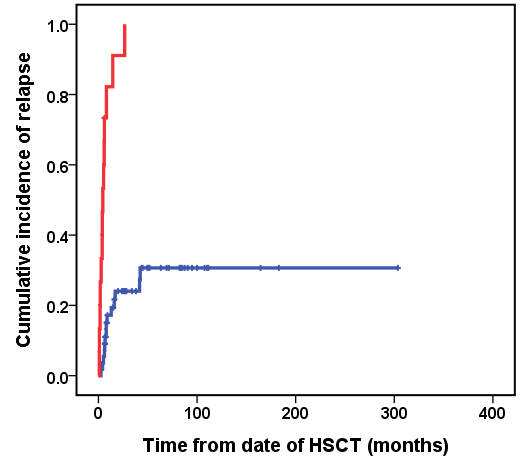  **MRD (-), n=55, median time to relapse: not reached**  **MRD (+), n=15, median time to relapse: 4.4 months**  ***P*<0.001** | 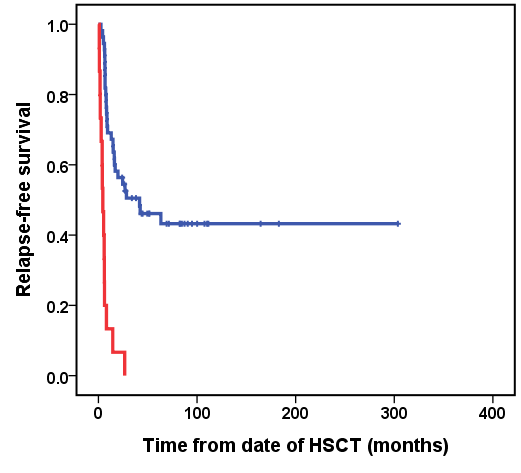  ***P*<0.001**  **MRD (-), n=55, median RFS: 41.7 months**  **MRD (+), n=15, median RFS: 4.4 months** |
| (c) |  |
| 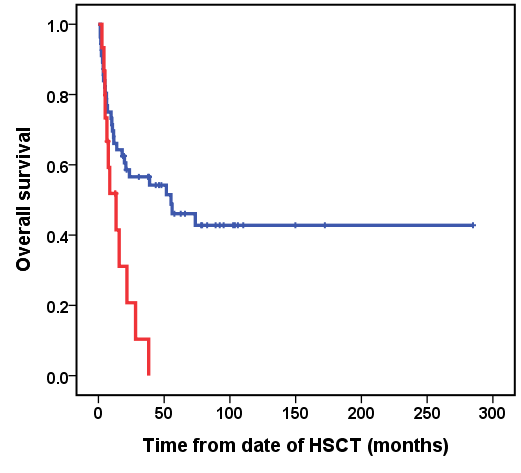  ***P*=0.006**  **MRD (-), n=56, median OS: 55.2 months**  **MRD (+), n=15, median OS: 13.4 months** |  |

**Supplemental Figure 8. Time to disease relapse (a), relapse-free survival (RFS) (b) and overall survival (OS) (c) in patients with pre-transplant revised international prognostic scoring system very low, low and intermediate-risk group myelodysplastic syndromes/neoplasms undergoing allogeneic hematopoietic stem cell transplantation (HSCT) according to next-generation sequencing–based measurable residual disease (MRD) status at 1 month post-transplant. MRD assessment excluded mutations in *DNMT3A*, *TET2*, and *ASXL1.***

| (a) | (b) |
| --- | --- |
| 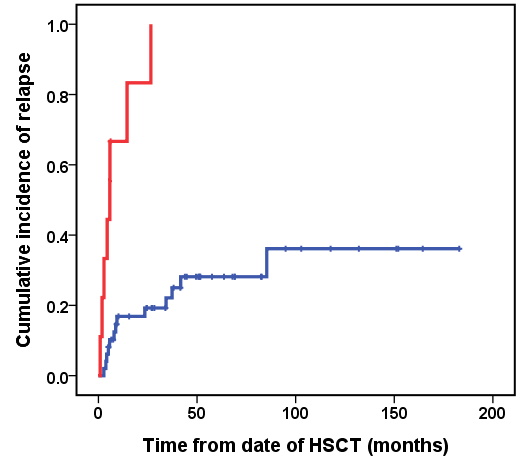  **MRD (-), n=49, median time to relapse: not reached**  **MRD (+), n=9, median time to relapse: 5.8 months**  ***P*<0.001** | 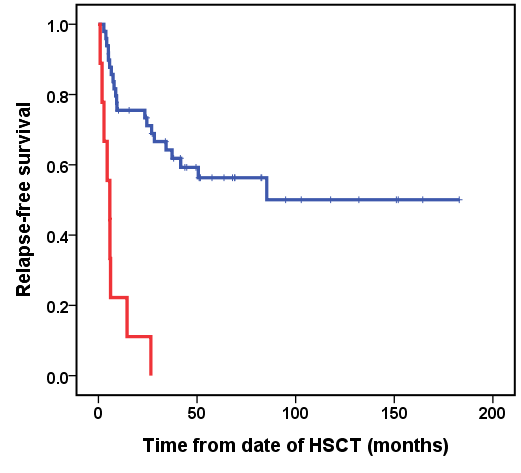  **MRD (-), n=49, median RFS: not reached**  **MRD (+), n=9, median RFS: 5.8 months**  ***P*<0.001** |
| (c) |  |
| 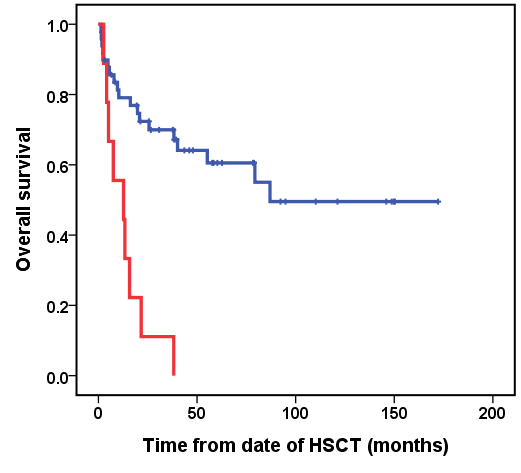  ***P*<0.001**  **MRD (-), n=49, median OS: 87.0 months**  **MRD (+), n=9, median OS: 12.7 months** |  |

**Supplemental Figure 9. Time to disease relapse (a), relapse-free survival (RFS) (b) and overall survival (OS) (c) in patients with pre-transplant revised international prognostic scoring system high or very high-risk group myelodysplastic syndromes/neoplasms undergoing allogeneic hematopoietic stem cell transplantation (HSCT) according to next-generation sequencing–based measurable residual disease (MRD) status at 1 month post-transplant. MRD assessment excluded mutations in *DNMT3A*, *TET2*, and *ASXL1.***

| (a) | (b) |
| --- | --- |
| 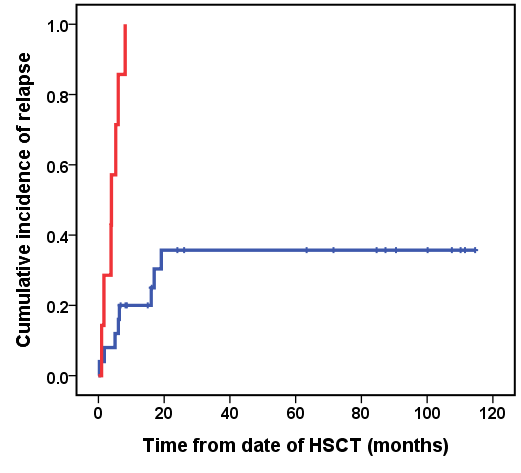  **MRD (-), n=25, median time to relapse: not reached**  **MRD (+), n=7, median time to relapse: 4.0 months**  ***P*<0.001** | 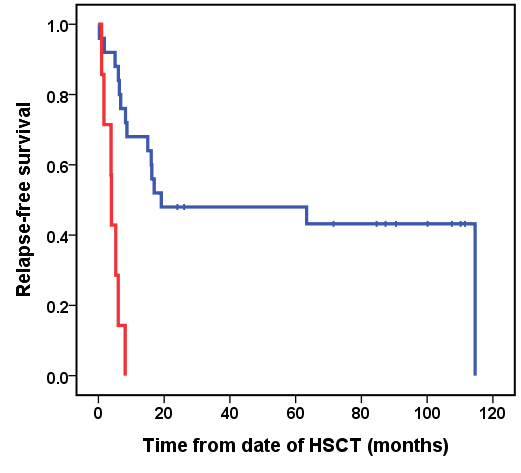  **MRD (-), n=25, median RFS: 19.1 months**  **MRD (+), n=7, median RFS: 4.0 months**  ***P*<0.001** |
| (c) |  |
| 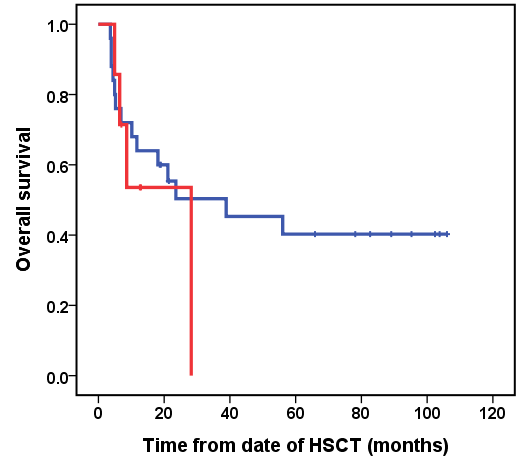  ***P*=0.452**  **MRD (-), n=25, median OS: 38.9 months**  **MRD (+), n=7, median OS: 28.3 months** |  |

**Supplemental Figure 10. Time to disease relapse (a), relapse-free survival (RFS) (b) and overall survival (OS) (c) in patients with myelodysplastic syndromes/neoplasms undergoing allogeneic hematopoietic stem cell transplantation (HSCT), stratified by conditioning regimen**

| (a) | (b) |
| --- | --- |
| 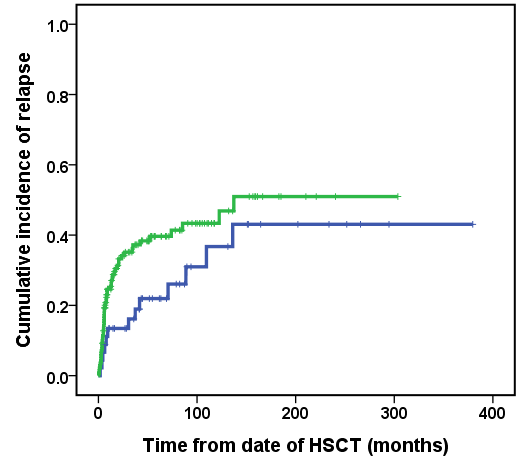  **MAC, n=45, median time to relapse: not reached**  **RIC, n=141, median time to relapse: 137.2 months**  ***P*=0.10** | 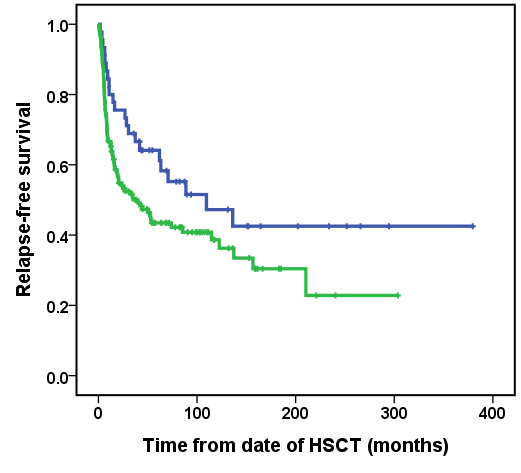  **MAC, n=45, median RFS: 109.6 months**  **RIC, n=141, median RFS: 40.1 months**  ***P*=0.050** |
| (c) |  |
| 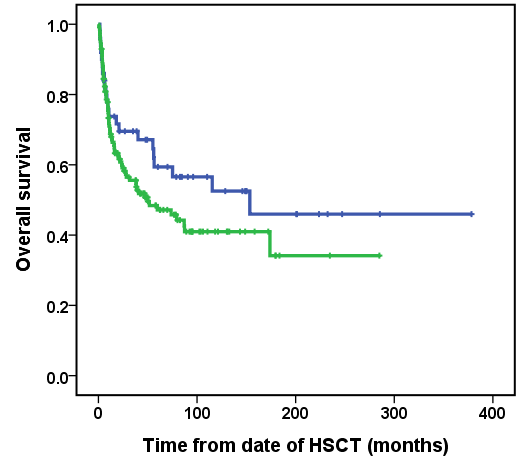  **MAC, n=50, median OS: 153.5 months**  **RIC, n=142, median OS: 50.1 months**  ***P*=0.165** |  |

Abbreviation: MAC, myeloablative conditioning; RIC, reduced intensity conditioning

**Supplemental Figure 11. Time to disease relapse, (b) relapse-free survival (RFS), and (c) overall survival (OS) in patients with myelodysplastic syndromes/neoplasms undergoing allogeneic hematopoietic stem cell transplantation (HSCT) with pre-transplant bone marrow blasts <5%, stratified by conditioning regimen.**

| (a) | (b) |
| --- | --- |
| 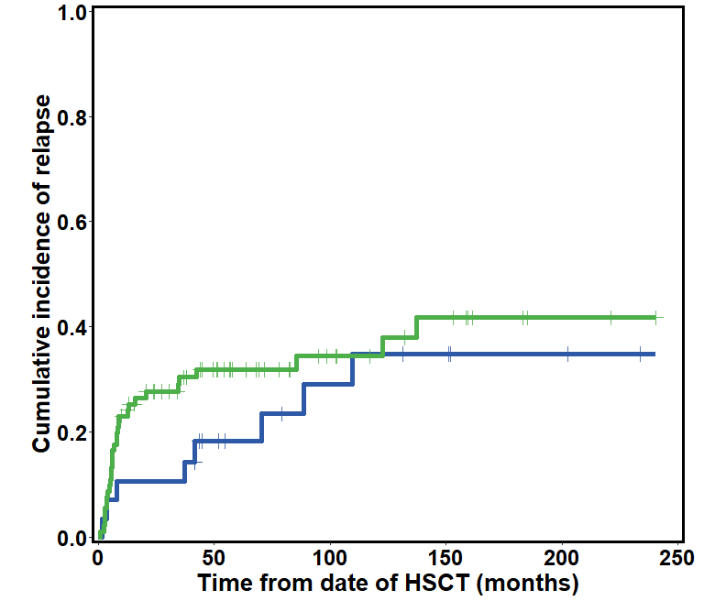  ***P*=0.32**  **MAC, n=21, median time to relapse: not reached**  **RIC, n=66, median time to relapse: not reached** | 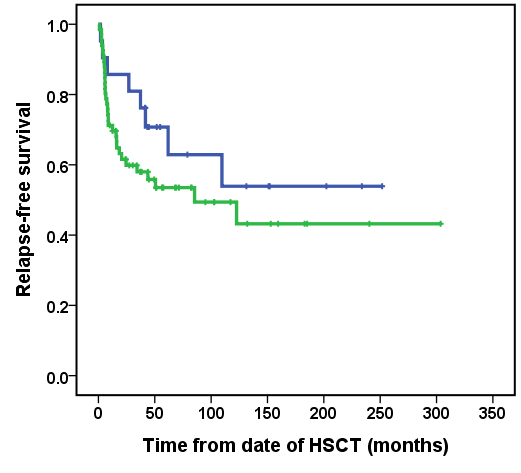  ***P*=0.250**  **MAC, n=21, median RFS: not reached**  **RIC, n=66, median RFS: 85.3 months** |
| (c) |  |
| 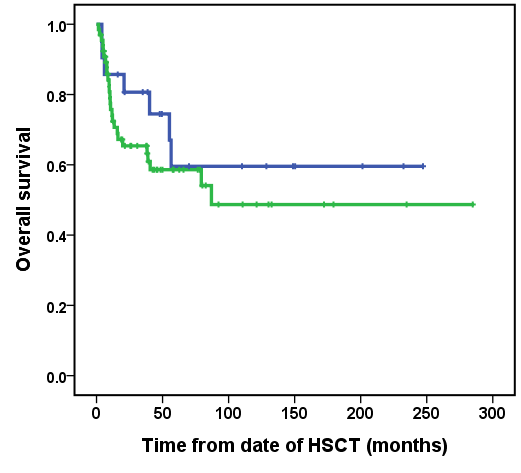  ***P*=0.353**  **MAC, n=21, median OS: not reached**  **RIC, n=66, median OS: 87.0 months** |  |

Abbreviation: MAC, myeloablative conditioning; RIC, reduced intensity conditioning
